# Supplementary material
Source: Springer Nature journal article supplement (https://www.springermedizin.de/resource/supplementary/12889_2013_6682_MOESM2_ESM.pdf/9498732)
Supplement: MOESM2 [file 9498732]

### Stage 1

- Obtained data from Australian Bureau of Statistics
- Participants: 1995 NNS (n=2223 children) 2007 ANCNPAS (n=4834)

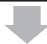

### Stage 2

- Excluded CATI 24 hour recall for 2007 data set
- Exclusions: 2007 ANCNPAS (n=4655)

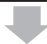

### Stage 3

- Remove implausible data [ $<2090\text{kJ}$  &  $>20900\text{kJ}$ ]
- Exclusions: 1995 NNS (n=34) 2007 ANCNPAS (n=32)

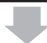

### Stage 4

- Categorised 1995 and 2007 data using ACAES foods [eTable 1]

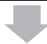

### Stage 5

- Stratify data based on age (2-4, 5-8, 9-12, 13-16 years), ACAES classification and gender

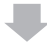

### Stage 6

- Pair data sets and exclude food categories that don't have comparable data in survey years
- Exclusions: n=6

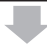

### Stage 7

- Calculate % consuming each food item in 1995 and 2007 [eTable 2]
- Exclude food items consumed by  $<5\%$  of the 2007 population
- Exclusions: 2-4y (n=48) 5-8y (n=44) 9-12y (n=42) 13-16y (n=47)

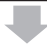

### Stage 8

- Conduct Mann Whitney U tests to determine whether portion size of specific foods changed between 1995 and 2007 for age and gender classifications
